# Supplementary material for: Upcycling of waste polyethylene terephthalate to dimethyl terephthalate over solid acids under mild conditions
Source: Royal Society of Chemistry journal article supplement (doi:10.1039/d3gc02051g), 2023-01-01
Supplement: d3gc02051g1.pdf [file d3gc02051g1.pdf]

Supplementary material for

**Upcycling of waste polyethylene terephthalate to dimethyl terephthalate over  
solid acid under mild conditions**

**Authors:**

Boyong Ye <sup>a</sup>, Ruru Zhou <sup>a</sup>, Zixin Zhong <sup>a</sup>, Songlin Wang <sup>b</sup>, Han Wang <sup>b</sup>, Zhaoyin Hou

<sup>a,b,\*</sup>

**Address:**

<sup>a</sup> Key Laboratory of Biomass Chemical Engineering of Ministry of Education, Department of  
Chemistry, Zhejiang University, Hangzhou 310028, China.

<sup>b</sup> Zhejiang Hengyi Petrochemical Research Institute Co., Ltd., Hangzhou 311200, China.

\* Corresponding author

Zhaoyin Hou

Tel/Fax: 86-571-88273283

Email: zyhou@zju.edu.cn

**Synthesis of SiO<sub>2</sub> or TiO<sub>2</sub>:** 180  $\mu$ L triethanolamine was added to 100 mL of deionized water, heated in an oil bath at 80 °C and stirred for 30 min. After that, 0.74 g of sodium salicylate and 1.52 g of CTAB were added, and the mixture was stirred for 30 min at a constant temperature. Then tetraethyl orthosilicate (TEOS, 4.16 g, 0.02 mol) was added, and stirring was continued at 80 °C for 9 h. After the reaction was stopped, the mixture was centrifuged (10000 rpm, 4 min), and the collected solids were dried in an 80 °C oven. The obtained solid powder was roasted for 4 h in a muffle furnace at 550 °C, and the resulting material was denoted as SiO<sub>2</sub>. Titanium tetraisopropanolate (TTIP, 5.68 g, 0.02 mol) was instead of TEOS to obtain TiO<sub>2</sub>.

**Synthesis of TiO<sub>2</sub>/SiO<sub>2</sub>-5/5:** 180  $\mu$ L triethanolamine was added to 100 mL of deionized water, heated in an oil bath at 80 °C and stirred for 30 min. After that, 0.74 g of sodium salicylate and 1.52 g of cetyltrimethylammonium bromide (CTAB) were added, and the mixture was stirred for 30 min at a constant temperature. Then 1.2 g of SiO<sub>2</sub> (0.02 mol, Sigma Aldrich Trading Co., Ltd, the average particle size is 50 nm) was added and stirred for 1 h. Thereafter, titanium tetraisopropanolate (TTIP, 5.68 g, 0.02 mol) was added dropwise, and stirring was continued at 80 °C for 9 h. After the reaction was stopped, the mixture was centrifuged (10000 rpm, 4 min), and the collected solids were dried in an 80 °C oven. The obtained solid powder was roasted for 4 h in a muffle furnace at 550 °C, and the resulting material was named TiO<sub>2</sub>/SiO<sub>2</sub>-5/5.

**Synthesis of SiO<sub>2</sub>/TiO<sub>2</sub>-5/5:** 180  $\mu$ L triethanolamine was added to 100 mL of deionized water, heated in an oil bath at 80 °C and stirred for 30 min. After that, 0.74

g of sodium salicylate and 1.52 g of CTAB were added, and the mixture was stirred for 30 min at a constant temperature. Then 1.6 g of TiO<sub>2</sub> (0.02 mol, Sigma Aldrich Trading Co., Ltd) was added and stirred for 1 h. Thereafter, tetraethyl orthosilicate (TEOS, 4.16 g, 0.02 mol) was added dropwise, and stirring was continued at 80 °C for 9 h. After the reaction was stopped, the mixture was centrifuged (10000 rpm, 4 min), and the collected solids were dried in an 80 °C oven. The obtained solid powder was roasted for 4 h in a muffle furnace at 550 °C, and the resulting material was named SiO<sub>2</sub>/TiO<sub>2</sub>-5/5.

**NH<sub>3</sub>-TPD:** The sample was first heated at 700 °C for 1 h in N<sub>2</sub> and then the reactor was cooled to 50 °C. The sample was exposed to NH<sub>3</sub> for 30 min, and then purged by Ar for 3 h at 50 °C to eliminate the physically adsorbed NH<sub>3</sub>. NH<sub>3</sub>-TPD was conducted by heating to 700 °C with a ramp of 15 °C/min, and the effluent was measured on the online quadrupole mass spectrometer.

**Pyridine-IR:** Pyridine-IR spectra was obtained on Tensor 27 (Bruker, Germany) using self-supporting wafers of approximately 20 mg (1.3 cm diameter). Prior to the measurements, the wafers were pretreated under vacuum at 300 °C for 1 h inside a home-built IR cell with ZnSe windows, exposed to pyridine at 150 °C, and then evacuated at the same temperature to remove the physisorbed pyridine. IR spectra were collected at 150 °C (32 scans with a resolution of 2 cm<sup>-1</sup>).

**Gel permeation chromatography (GPC) analysis:** The average molecular weight of remaining solids during the alcoholysis of PET was detected using GPC with a refractive index detector. PET solid was dissolved using hexafluoroisopropanol

(HFIP) and prepared into a solution of 2.23 mg/mL. The column temperature was 35 °C, the mobile phase was hexafluoroisopropanol (HFIP) at a flow rate of 0.5 mL/min and the injection volume was 100  $\mu$ L. The GPC was calibrated and the standard curve was established using standard polymethyl methacrylate (PMMA) samples.

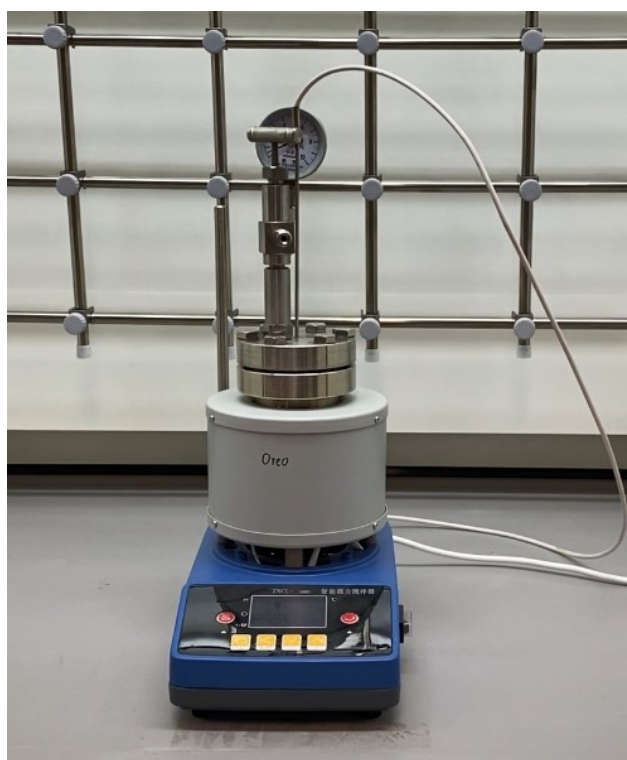

**Fig. S1.** The photograph of the high-pressure reactor and electric heating apparatus.

**Table S1.** The physical and chemical properties of various materials.

| Materials                            | $S_{\text{BET}}$ ( $\text{m}^2/\text{g}$ ) | Pore diameter (nm) | Pore volume ( $\text{cm}^3/\text{g}$ ) |
|--------------------------------------|--------------------------------------------|--------------------|----------------------------------------|
| $\text{SiO}_2$                       | 526                                        | 1.4, 13.3          | 2.5                                    |
| $\text{SiO}_2/\text{TiO}_2$ -<br>5/5 | 264                                        | 1.4, 4.8           | 1.1                                    |
| $\text{TiO}_2/\text{SiO}_2$ -<br>5/5 | 137                                        | 1.4, 4.7           | 0.8                                    |
| $\text{TiO}_2$                       | 34                                         | 8.4                | 0.2                                    |

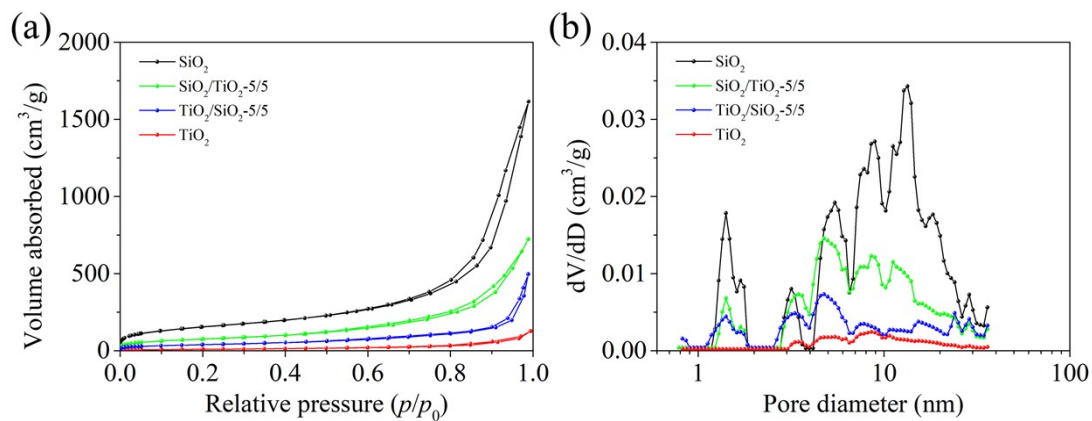

**Fig. S2.**  $N_2$  adsorption-desorption isotherms (a) and pore size distributions (b) of various materials.

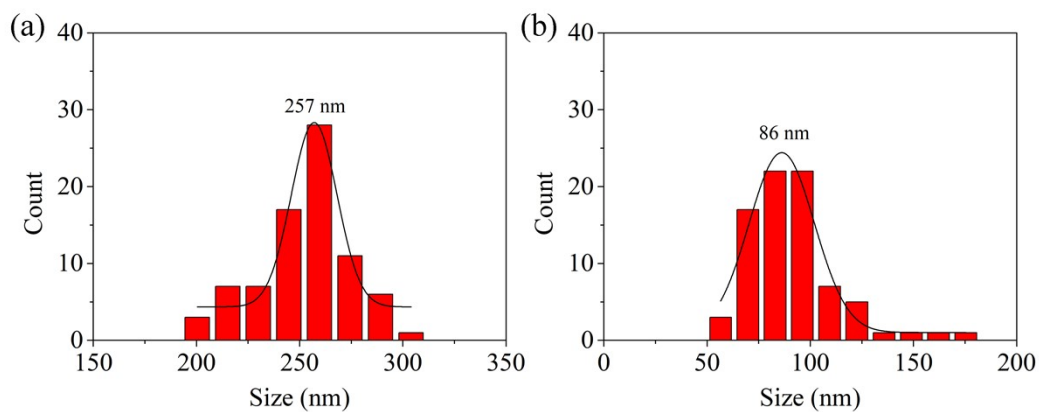

**Fig. S3.** Particle size distributions of (a)  $Ti_{0.1}Si_{0.9}O_2$  and (b)  $Ti_{0.5}Si_{0.5}O_2$ .

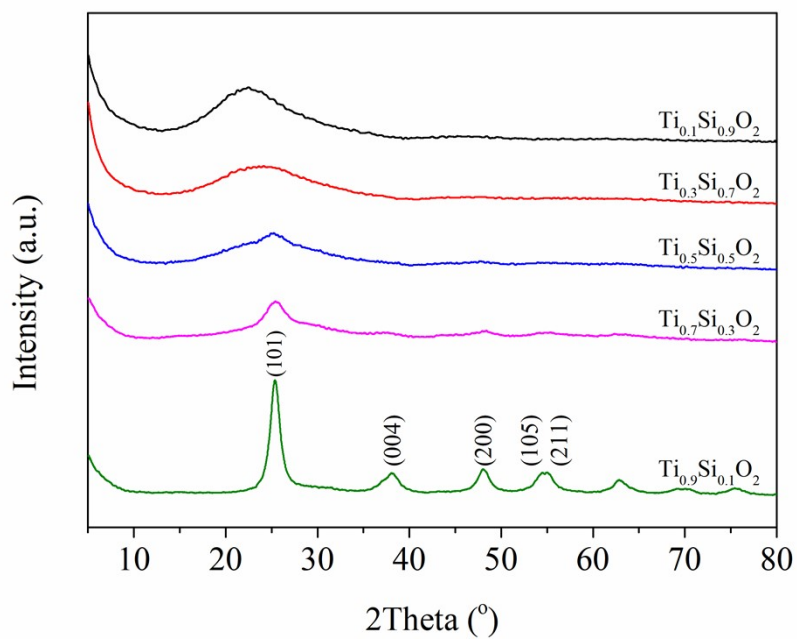

**Fig. S4.** XRD patterns of  $\text{Ti}_x\text{Si}_{1-x}\text{O}_2$  catalysts.

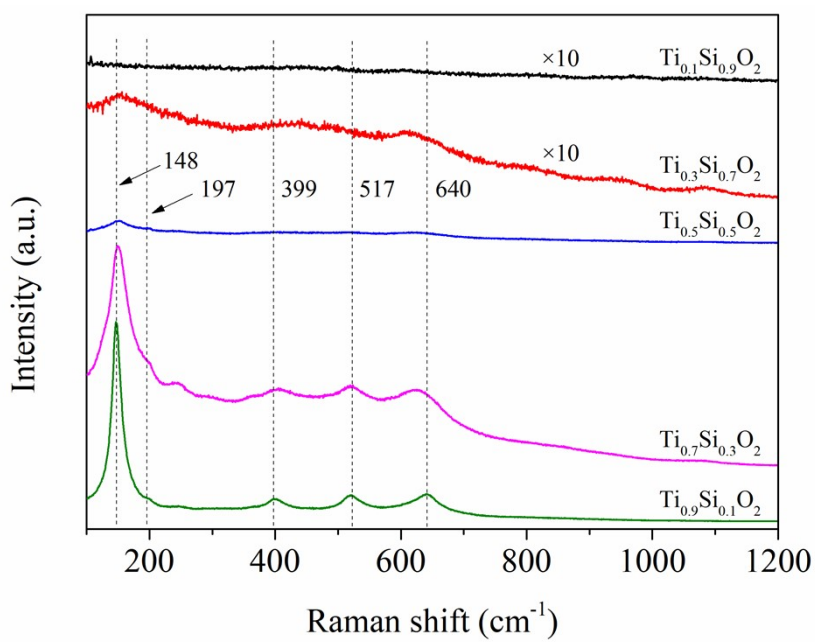

**Fig. S5.** Raman spectra of  $\text{Ti}_x\text{Si}_{1-x}\text{O}_2$  catalysts.

**Table S2.** Values for the chemical shift, the full individual line width at half height and the percentage of  $Q^n$  obtained from the analysis of  $^{29}\text{Si}$  MAS NMR.

| Catalyst                                   | Structural type | $-\delta$ (ppm) | FWHH (ppm) | $Q^n$ (%) |
|--------------------------------------------|-----------------|-----------------|------------|-----------|
| $\text{Ti}_{0.5}\text{Si}_{0.5}\text{O}_2$ | $Q_4$           | -110.0          | 8.5        | 43.9      |
|                                            | $Q_3$           | -101.3          | 10.0       | 53.4      |
|                                            | $Q_2$           | -92.2           | 4.4        | 2.7       |

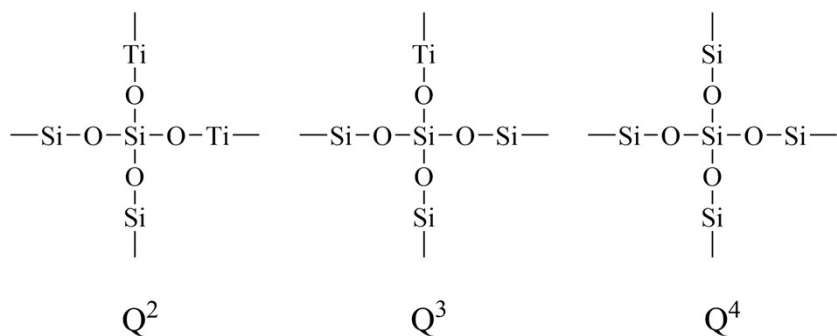

**Fig. S6.** Schematic diagram of  $Q^n$  structural unit.

**Table S3.** Binding energies of  $\text{Ti}_x\text{Si}_{1-x}\text{O}_2$ .

| Catalysts                                  | Ti $2p_{3/2}$ (eV) | Ti $2p_{1/2}$ (eV) | Si $2p$ (eV) | O $1s$ (eV)  |
|--------------------------------------------|--------------------|--------------------|--------------|--------------|
| $\text{Ti}_{0.1}\text{Si}_{0.9}\text{O}_2$ | 459.2              | 464.8              | 103.7        | 530.7, 533.0 |
| $\text{Ti}_{0.3}\text{Si}_{0.7}\text{O}_2$ | 459.0              | 464.7              | 103.5        | 530.6, 532.8 |
| $\text{Ti}_{0.5}\text{Si}_{0.5}\text{O}_2$ | 459.0              | 464.7              | 103.2        | 530.6, 532.7 |
| $\text{Ti}_{0.7}\text{Si}_{0.3}\text{O}_2$ | 458.9              | 464.6              | 102.7        | 530.3, 532.2 |
| $\text{Ti}_{0.9}\text{Si}_{0.1}\text{O}_2$ | 458.8              | 464.5              | 102.4        | 530.1, 532.0 |

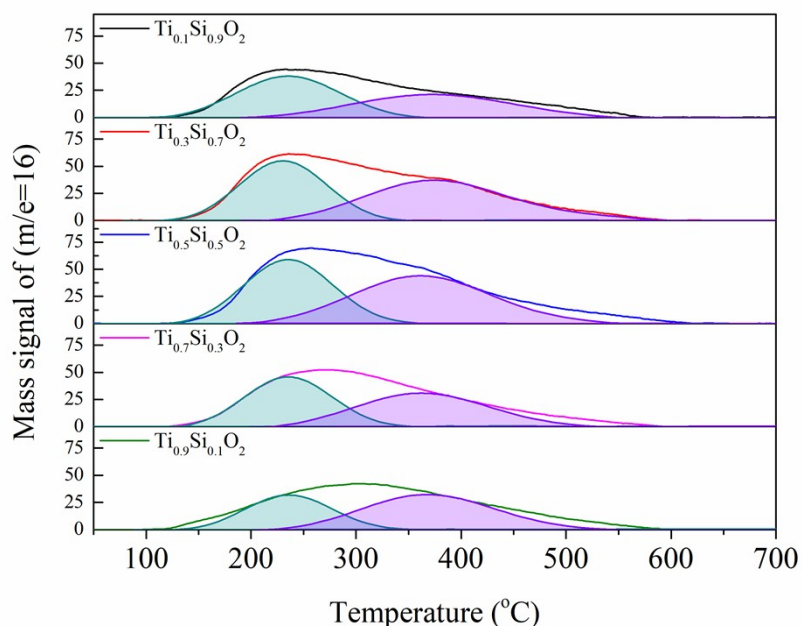

**Fig. S7.** NH<sub>3</sub>-TPD profiles of Ti<sub>x</sub>Si<sub>1-x</sub>O<sub>2</sub> catalysts.

**Table S4.** Catalytic performance of catalysts for the PET alcoholysis to DMT<sup>a</sup>.

| Catalysts                                          | PET conversion (%) | DMT yield (%) | MHET yield (%) |
|----------------------------------------------------|--------------------|---------------|----------------|
| Ti <sub>0.4</sub> Si <sub>0.6</sub> O <sub>2</sub> | 87.0               | 77.5          | 4.1            |
| Ti <sub>0.5</sub> Si <sub>0.5</sub> O <sub>2</sub> | 87.3               | 79.0          | 3.8            |
| Ti <sub>0.6</sub> Si <sub>0.4</sub> O <sub>2</sub> | 80.5               | 71.9          | 5.6            |
| H <sub>2</sub> SO <sub>4</sub>                     | 8.3                | 4.2           | 1.3            |
| AlCl <sub>3</sub>                                  | 4.6                | 1.5           | 0.8            |
| TiO <sub>2</sub> /SiO <sub>2</sub> -5/5            | 36.4               | 8.8           | 5.1            |
| SiO <sub>2</sub> /TiO <sub>2</sub> -5/5            | 8.8                | 1.7           | 1.1            |
| TiO <sub>2</sub>                                   | <1.0               | 0.1           | <0.1           |
| SiO <sub>2</sub>                                   | <1.0               | 0.1           | <0.1           |

<sup>a</sup> Reaction conditions: 1 g PET, 0.025 g catalyst, 10 mL MeOH, 150 °C, 2 h.



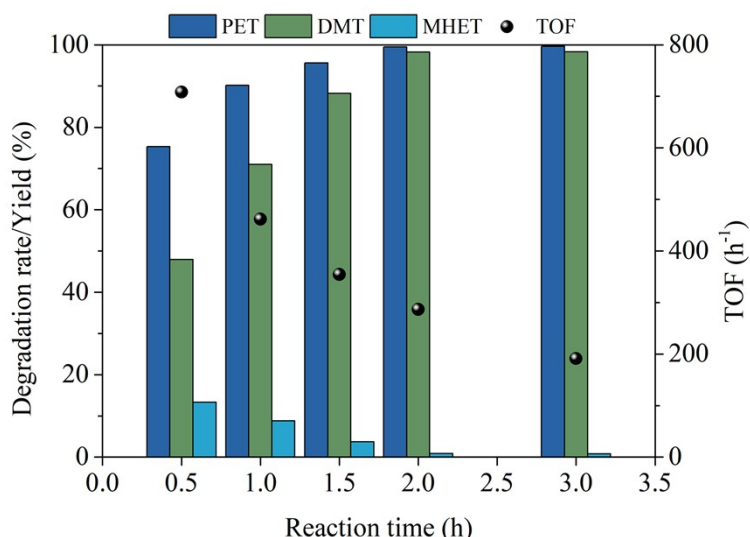

**Fig. S8.** Performance of  $\text{Ti}_{0.5}\text{Si}_{0.5}\text{O}_2$  under different reaction times. Reaction conditions: 1 g PET, 0.025 g  $\text{Ti}_{0.5}\text{Si}_{0.5}\text{O}_2$ , 10 mL methanol, 160 °C.

**Table S5.** The comparison of fresh and spent  $\text{Ti}_{0.5}\text{Si}_{0.5}\text{O}_2$ .

| Catalyst                                         | $W_{\text{Ti}}$ (%) <sup>a</sup> | $W_{\text{Si}}$ (%) <sup>a</sup> | $n(\text{Ti}/\text{Si})$ <sup>b</sup> | Acidity (mmol/g) <sup>c</sup> |
|--------------------------------------------------|----------------------------------|----------------------------------|---------------------------------------|-------------------------------|
| Fresh $\text{Ti}_{0.5}\text{Si}_{0.5}\text{O}_2$ | 38.70                            | 21.13                            | 1.07                                  | 0.36                          |
| Spent $\text{Ti}_{0.5}\text{Si}_{0.5}\text{O}_2$ | 38.29                            | 21.12                            | 1.06                                  | 0.35                          |

<sup>a</sup> Measured by ICP-OES.

<sup>b</sup> Calculated according to ICP-OES results.

<sup>c</sup> Measured via acid-base titration.

**Table S6.** The physical properties of fresh  $\text{Ti}_{0.5}\text{Si}_{0.5}\text{O}_2$  and spent  $\text{Ti}_{0.5}\text{Si}_{0.5}\text{O}_2$ .

| Catalysts                                        | $S_{\text{BET}}$ (m <sup>2</sup> /g) | Pore diameter (nm) | Pore volume (cm <sup>3</sup> /g) |
|--------------------------------------------------|--------------------------------------|--------------------|----------------------------------|
| Fresh $\text{Ti}_{0.5}\text{Si}_{0.5}\text{O}_2$ | 407                                  | 1.5, 5.1           | 1.06                             |
| Spent $\text{Ti}_{0.5}\text{Si}_{0.5}\text{O}_2$ | 334                                  | 1.7, 4.9           | 0.79                             |

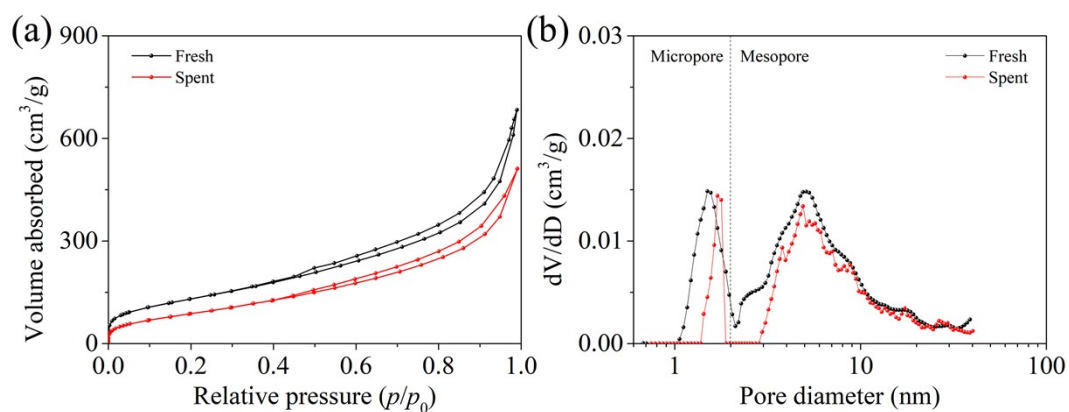

**Fig. S9.** N<sub>2</sub> adsorption-desorption isotherms (a) and pore size distributions (b) of fresh Ti<sub>0.5</sub>Si<sub>0.5</sub>O<sub>2</sub> and spent Ti<sub>0.5</sub>Si<sub>0.5</sub>O<sub>2</sub>.

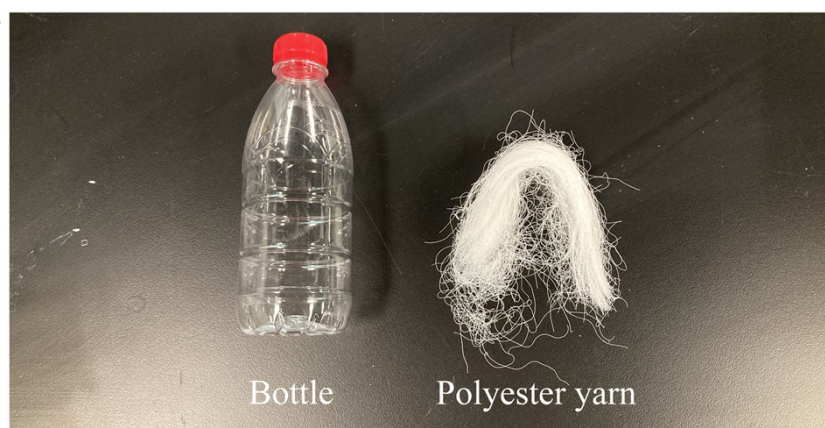

**Fig. S10.** Alcoholysis of PET bottle and Polyester yarn over Ti<sub>0.5</sub>Si<sub>0.5</sub>O<sub>2</sub>.

Reaction conditions: 1 g PET-based product, 0.025 g Ti<sub>0.5</sub>Si<sub>0.5</sub>O<sub>2</sub>, 10 mL MeOH, 160 °C, 3 h.

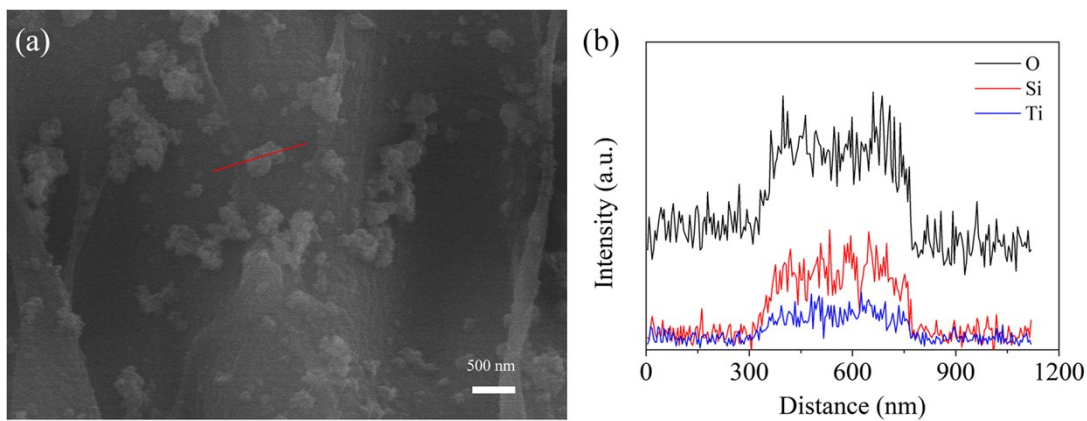

**Fig. S11.** (a) SEM image and (b) line-ed of PET and Ti<sub>0.5</sub>Si<sub>0.5</sub>O<sub>2</sub>.

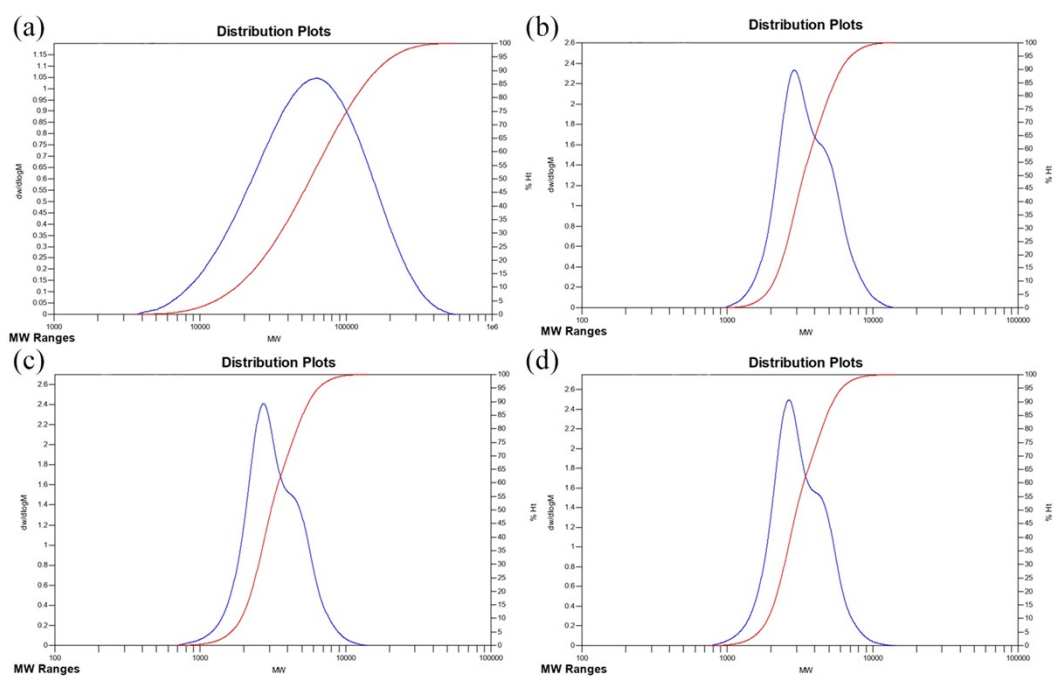

**Fig. S12.** Molecular weight of (a) raw PET and the remaining solid after different reaction times (b) 0.5 h, (c) 2 h and (d) 4 h.

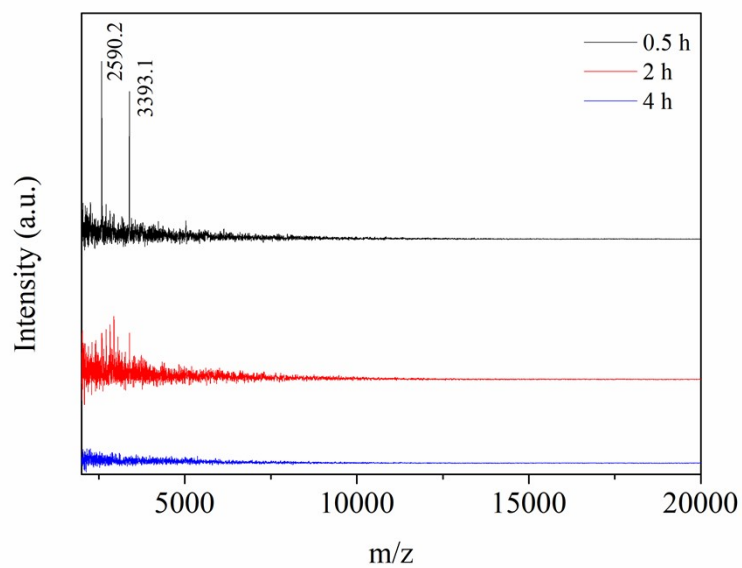

**Fig. S13.** MALDI-TOF-MS spectra of the reaction solution. Reaction conditions: 1 g PET, 0.025 g  $\text{Ti}_{0.5}\text{Si}_{0.5}\text{O}_2$ , 10 mL methanol, 150 °C.
